# Supplementary figures and images for: Application of multiple levels of fluid shear stress to endothelial cells plated on polyacrylamide gels
Source: Royal Society of Chemistry journal article supplement (doi:10.1039/c4lc01236d), 2015-01-01

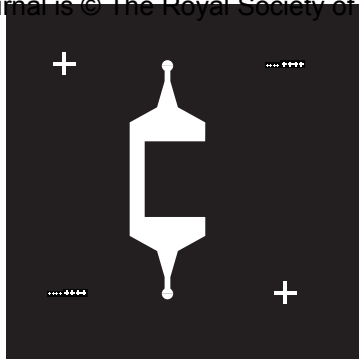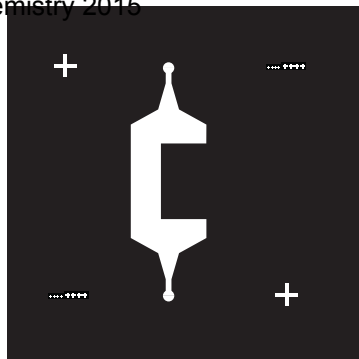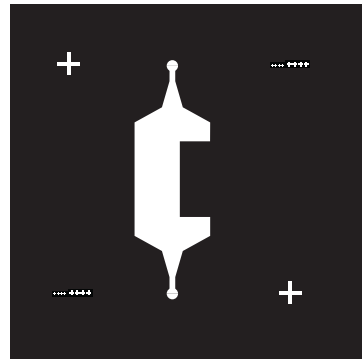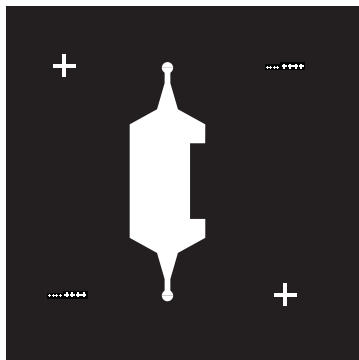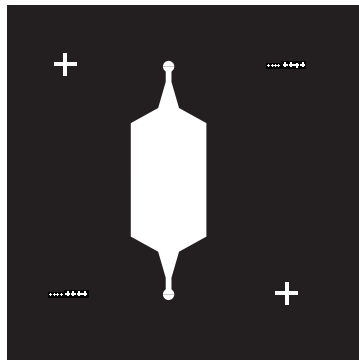

Supplement: c4lc01236d1.pdf [file c4lc01236d1.pdf]
